1 Recurrent spontaneous seizures have been considered the sine qua non of epilepsy. Epileptic  
2 seizures were first associated with intense electrical activity measured from the brain in 1933 <sup>1</sup>.  
3 Spreading depression of brain activity was discovered by Leão in 1944 <sup>2</sup>, and has since been shown  
4 associated with migraine, stroke and traumatic brain injury <sup>3,4</sup>. Although for many years spreading  
5 depression was thought to have only rare genetic links to epilepsy <sup>5</sup>, recently it has been proposed  
6 that seizure-triggered spreading depression could underlie sudden unexplained death in epilepsy  
7 (SUDEP) <sup>6</sup>. The physiological underpinning of spreading depression is an electrical spreading  
8 depolarization (SD) of brain cells. The depolarization is associated with a large, prolonged  
9 negative shift in tissue potential that cannot be well detected with standard human  
10 electroencephalographic (EEG) technology. Nevertheless, in recent years, computational models  
11 of the dynamics of neuron biophysics have shown a linkage between seizures and SD <sup>7</sup>, and have  
12 predicted the possibility of dynamic trajectories linking the two phenomena <sup>8</sup>. We developed a  
13 recording system for chronic, long-term measurements that provides a view of the complex  
14 interactions between spontaneous epileptic seizures and spreading depolarizations in the intact  
15 brain <sup>9</sup>. We here experimentally demonstrate these theoretically predicted trajectories in multiple  
16 animal models of epilepsy, showing that spontaneous single seizures are frequently associated with  
17 SD, and that SD may mediate between seizures within clusters. We therefore propose that the ictus  
18 of epilepsy may be a combination of seizures and SD.

## 19 Main

20 We found, from thousands of days of long-term continuous DC-sensitive chronic recordings,  
21 frequent instances of seizure associated SD in two very different chronic animal models of  
22 epilepsy: the rat tetanus toxin (TeTX) model of temporal lobe epilepsy (TLE) <sup>10,11</sup> (Fig. 1A) and  
23 the murine model of post-cerebral malaria (post-CM) epilepsy <sup>9</sup> (Fig. 1B). Shown in Fig. 1A-B are

1 typical examples of SD following seizures, with the seizures evident from band-pass filtered  
2 signals (1-55 Hz) in the upper panels, and the SD from the low-pass filtered signals (< 1 Hz) in the  
3 bottom panels. SD either overlapped with (Fig. 1A) or followed (Fig. 1B) the seizure. In both  
4 models, the amplitude, duration and propagation between electrodes of the slow shift in tissue  
5 electrical potential are consistent with changes in extracellular potential observed during  
6 experimentally induced SD in vitro, as shown in Fig. 1C as well as other reports of acute SD<sup>12-</sup>  
7<sup>16</sup>. During the large negative deflection of the tissue potential in the very low frequency range, we  
8 observed marked suppression of EEG activity (Fig. 1A). This is consistent with the spreading  
9 depression subtype of SD. The later reappearance of seizure-like spiking activity correlates with  
10 the return of the very low-frequency potential to near its baseline value. This pattern is consistent  
11 with recovery dynamics from acutely-induced SD termed spreading convulsions<sup>4,17</sup>.

12 Although seizure-related SDs often overlapped with demonstrable suppression of EEG activity,  
13 we also found post-ictal generalized EEG suppression (PGES) that occurred without concurrent  
14 SD (Fig. S2).

15 The large slow shifts in the tissue potential associated with SD reside in the very low frequency  
16 (1-100 mHz) range. Unless a wide digitization range and non-polarizing electrodes with sufficient  
17 surface area are used, within these ranges measurements are dominated by electrode-tissue  
18 electrochemical polarization driven by the input current of the amplifier. To eliminate the  
19 electrochemical-based signal components and to restrict the signal to what could be acquired with  
20 a standard digitizer, in most acquisition systems the measurements are high-pass filtered (e.g.  
21 > 1 Hz) and therefore slow potential shifts associated with SD are removed<sup>18,19</sup>.

22 To simultaneously measure SD and field potentials we used custom-made micro reaction chamber  
23 ( $\mu$ RC) electrodes with electrodeposited iridium oxide films (EIROF)<sup>20</sup> with a direct current (DC)-

1 sensitive acquisition system <sup>9</sup>. The fidelity of this recording combination is demonstrated *in vitro*  
2 in Fig. 2. With an applied sinusoidal electric field, we observed only minor signal attenuation with  
3 50  $\mu\text{m}$  (diameter)  $\mu\text{RC}$  EIROF (Fig. 2B-C red trace) electrodes at frequencies relevant to SD (0.01  
4 Hz). This is in contrast to 17  $\mu\text{m}$  Nichrome electrodes (Fig. 2B-C black trace), which are included  
5 to illustrate that electrodes with poorly matched impedance – to the input impedance of the  
6 amplifier – will inherently high-pass filter the tissue potentials.

7 The measurements in the included animals from both models were sufficiently stable during the  
8 entire recording periods – typically more than 2 continuous weeks – to capture similar SD events  
9 as presented in Fig. 1. We operationally define “sufficient stability” as having baseline (low-  
10 frequency) fluctuations with amplitudes substantially less than 10 mV over hour-long periods.  
11 Shown in Fig. S3 are the maximal fluctuations per hour of the unfiltered left hippocampal electrode  
12 potential over 8 consecutive days of recording in one epileptic mouse first without seizures (Fig.  
13 S3 upper panel) and then with seizure-associated SDs (Fig. S3 bottom panel). For every hour  
14 during the seizure-free period (Fig. S3 upper panel), the hippocampal measurements fluctuate  
15 smoothly with a maximal range ( $< 6$  mV) much smaller than the  $\gg 10$  mV low-frequency  
16 potential differences associated with SD episodes. However, the within-hour fluctuations are much  
17 larger for the hours with seizures-associated SDs (magenta arrows in Fig. S3 bottom panel). The  
18 negative deflection in tissue potential during SD leads to distinct large variations in the recording  
19 electrode’s potential. These DC fluctuations associated with SDs are fully separable from steady  
20 state potentials and mechanically or electronically induced artifacts.

21 The two animal models of epilepsy utilized in this study are fundamentally different. The TeTX  
22 model of temporal lobe epilepsy is induced with intrahippocampal injection of tetanus toxin which  
23 creates a focal lesion with modulated neuronal excitability, and produces secondary generalized

1 seizures. In this model seizures emanate from sites throughout ventral hippocampi and generalize  
2 to other hippocampal and cortical regions. SDs appeared to originate from variable sites  
3 throughout the dorsal-ventral hippocampi (Fig. S4A-C) with occasional episodes of SD invading  
4 the cortex (data not shown). SDs often occurred during or at the end of well-spaced seizures (Fig.  
5 S4B-C). In seizure clusters SD dynamics appeared to connect the individual seizures (Fig. 3A,  
6 and Fig. S4A cyan trace).

7 Across 124 cumulative days of recordings from 5 epileptic rats, 425 of 1256 seizures had co-  
8 occurring SD events (estimated rate =  $33\% \pm 1\%$ , see methods for the propagated error) (Fig. 3B).

9 The murine model of post-CM epilepsy<sup>9</sup> mimics human conditions of post-infection acquired  
10 epilepsy with long epileptogenesis<sup>21</sup> and spontaneous unprovoked seizures. In this model the brain  
11 undergoes widespread damage, and the seizure origins and evolution patterns vary. We observed  
12 episodes of SD occurring during or after the seizures in one or both hippocampi (Fig. S5A-C)  
13 and/or cortex (Fig. S5D) in 171 of 442 total seizures (estimated rate =  $38\% \pm 2\%$ ) (Fig. 3C).

14 Collectively seizures were pooled from 21 epileptic mice with 1139 cumulative days of recordings.  
15 The SD pattern was uncorrelated with seizure origin or evolution (Fig. S6A-C), and SD was  
16 observed in all four mouse-parasite strain combinations studied (Fig. S6D).

17 In both animal models and all instances of SD the amplitude of the negative DC deflection,  
18 duration of the deflection, propagation, and existence of a quiescence period reflective of neuronal  
19 depolarization were consistent with SD characteristics, as was the frequent observation of spiking  
20 activity at SD offset<sup>17</sup>. The SD events in the TeTX rats were often concurrent with depression of  
21 EEG activity. Therefore we mark these SDs as spreading depression subtype of the spreading  
22 depolarization phenomenon.

1 In post-CM epileptic mice, the apparent propagation speed of SD from left to right hippocampus  
2 was approximately 6 mm/min. However, within hippocampi in the TeTX rats, with 3-4  
3 hippocampal recording electrodes, the propagation speed of SD measured in the midst of  
4 prolonged and spatially extended seizures appears to be faster (6 to 40 mm/min). We hypothesize  
5 that, in these cases, the tissue is primed to support faster propagation perhaps analogous to the way  
6 that seizure propagation speeds can be parametrically modulated via neuronal excitability<sup>22,23</sup>.  
7 SD events are shown to generate long bouts of acidosis<sup>24,25</sup>. It is therefore important to note that  
8 our observations are not artifacts of the pH dynamics. Although the  $\mu$ RC EIROF electrodes are  
9 pH sensitive (<sup>26</sup>, and as described in Methods), the expected change from SD acidosis yields  
10 positive deflections in the electrode potential, and therefore would *cancel* some of the actual  
11 negative shift in tissue potential observed during SD.

12 In order to confirm the linkage between SD and seizures, we scored data from age-matched control  
13 animals who had viable DC recordings for appearance of SD-like events. In rats controls included  
14 animals that did not receive TeTX injections (N = 2, 154 cumulative recording days), and rats with  
15 TeTX injection that did not develop epilepsy (N = 1, 80 recording days). In mice, control data  
16 included uninfected animals with no seizures (N = 17, 820 cumulative recording days), and  
17 animals rescued from CM that did not develop seizures (N = 6 mice, 282 cumulative recording  
18 days). No SD-like events were observed in any of these groups.

19 From a rest or steady state, a neuronal system exhibits excitability when in response to small  
20 perturbations it takes a dynamical trajectory determined by the presence of bifurcations in its  
21 underlying mathematical structure. Such trajectories have been extensively characterized for single  
22 neuron spiking<sup>27,28</sup>, and with the incorporation of fast sodium and slower potassium dynamics for  
23 complex burst and seizure firing dynamics<sup>29,30</sup>. The dynamics characteristic of experimental

1 hypoxic seizure patterns can be described by utilizing oxygen as an experimental and theoretical  
2 bifurcation parameter <sup>31</sup>. Combination of oxygen and potassium as state variables, as well as ion  
3 mass and charge conservation and energy balance, uncovers the unification between steady-state,  
4 spikes, seizures, and spreading depolarization <sup>7</sup>. The subdivision of the dynamics within the  
5 oxygen-potassium state space is illustrated in Fig. 4A (adapted from <sup>7</sup>). Cellular volume fraction  
6 as another bifurcation parameter further separates seizure from spreading depolarization dynamics  
7 during trajectories that visit them in sequence <sup>8</sup>.

8 If one classifies brain state in our measurements into the discrete states: steady state (SS), seizure  
9 (SZ) and SD, then the time series of discrete states can be represented by continuous trajectories  
10 through the oxygen-potassium state space illustrated in Fig. 4A&C. Two of the most common  
11 state series we observe are represented by the trajectories illustrated in Fig. 4A (SS→SZ→SS in  
12 cyan, and SS→SZ→SD→SS in green). Even the transition dynamics observed in Fig. 4B, in  
13 which a seizure is followed by repeated SD events, is naturally described by the looping magenta  
14 trajectory in Fig. 4C.

15 Because the state space of the system includes un-represented slow variables such as extracellular  
16 volume and vascular tone, trajectories can cross in this two-dimensional projection. Validation of  
17 the linkage between such computational modeling and *in-vivo* observed dynamics can be done  
18 through casting the measurement time series into a discrete-state transition model, as illustrated in  
19 Fig. 4D, and then statistically correlating the transition probabilities ( $\alpha_{i,j}$ ) as a function of the  
20 modeled state variables, such as tissue oxygen pressure and extracellular potassium.

21 Our recording system offers, for the first time, the opportunity to investigate the theoretically  
22 predicted complex interaction between seizures and spreading depolarizations in an intact brain.  
23 Within two fundamentally different animal models of chronic epilepsy, we observed direct

1 transitions and dynamical interplay between SDs and spontaneous seizures. Moreover, in the  
2 epileptic rats we often observe that seizures that occur in clusters are connected by SD events (Fig.  
3 3A, Fig. S4A). Our findings suggest that beyond EEG, currently unobserved parameters such as  
4 extracellular volume, potassium, and tissue oxygenation are important in orchestrating the  
5 dynamics observed in epilepsy. Furthermore we propose an expanded definition for the event or  
6 ictus in epilepsy that encompasses dynamical trajectories that combine both seizures and SD, and  
7 better account for the electrical and behavioral manifestations during epilepsy.

8

9



1 Methods

2 All animal work was approved by and performed under administration of Institutional Animal  
3 Care and Use Committee at the Pennsylvania State University.

4 Post-Cerebral Malaria Epilepsy Model:

5 Infection and Treatment:

6 Donor animals were infected from frozen stocks of *Plasmodium berghei* ANKA (PbANKA) or  
7 *Plasmodium berghei* NK65 (Pb-NK65) parasite, and blood was drawn on day 7 for inoculation  
8 into homologous experimental animals. Swiss Webster (SW), C57BL/6 (Charles Rivers  
9 Laboratory) and CBA/CaJ (CBA, Jackson Laboratory) male mice were infected by intraperitoneal  
10 injection of infected red blood cells from the donor animal. Age-matched control mice were  
11 inoculated with red blood cells from un-infected donor animals, and otherwise received identical  
12 drug and monitoring treatment.

13 Animals were treated by anti-malarial medication, Artesunate (64 mg/kg dosage), for seven days  
14 starting from day 5 (C57BL/6-PbANKA or CBA-PbANKA), day 6 (SW-PbANKA) and day 7  
15 (SW-PbNK65) post-infection. We based our treatment plan on observations in human cases where  
16 epilepsy is a sequela of well-developed CM rather than cases with early detection and treatment.

17 Animal Surgery and Care:

18 Animals were implanted with electrodes to monitor brain activity at least five days post-treatment  
19 following procedures described in<sup>9</sup>. Briefly, four stainless steel screws (#000 self-tapping, Morris  
20 Co.) were placed over frontal (AP +1.5, ML  $\pm$ 2.5 mm) and S1 (AP -2.3, ML  $\pm$ 3.5 mm) cortices  
21 for measurements of electrocorticogram (ECoG). Two custom-made 50  $\mu$ m (diameter) ultra-low  
22 impedance micro-reaction chamber ( $\mu$ RC)<sup>20</sup> electrodes were further enhanced by electrodeposition  
23 of iridium oxide films (EIROF)<sup>20</sup> to provide DC stability and high charge passing capacity. The  
24 electrodes were then implanted bilaterally in dorsal hippocampi (AP -2.3, ML  $\pm$ 2.0, DV -1.5 mm)  
25 to provide hippocampal depth recordings. All coordinates were Bregma referenced.

1 Muscle activity was monitored via a 3 mm long 50  $\mu$ m gold-plated 316L stainless steel wire placed  
2 into a bluntly dissected opening within the nuchal muscles and further secured with polyglycolic  
3 acid absorbable sutures through the subcutaneous tissue. A fraction of animals were implanted  
4 with a lead in the precordium to monitor electrocardiogram (ECG) activity. Electrodes were then  
5 secured in place and electrically isolated via a 3D printed multi-groove headmount embedded in  
6 dental cement.

7 At the completion of the surgery, animals were housed individually in custom-made plexiglass  
8 cages each containing two enclosures with dimensions 6"W $\times$ 12"D $\times$ 12"H with free access to food  
9 and water, and, following recovery, were cabled for continuous video and EEG monitoring.

10 Implanted mice were cabled to the acquisition board which hangs down through a 1.5 inch hole in  
11 the ceiling of each enclosure. The board is connected to a custom-made commutator to allow for  
12 postural flexibility and free movement of the animals. A 12 hour light-dark cycle was maintained  
13 with the lights on between 6 am and 6 pm. During the dark period infrared LED arrays were used  
14 to illuminate the cage for continuous 24-hour video monitoring. Synchronized video (at 3 frames  
15 per second) and EEG recordings began once the animals were successfully cabled.

16 Rat Tetanus Toxin Model of Temporal Lobe Epilepsy:

17 Animal Surgery and Care:

18 Male and female Long-Evans rats, weighing 250-350 grams, were implanted with recording  
19 electrodes and received tetanus injections during the same surgical procedure following methods  
20 described previously<sup>10</sup>. In short, to induce epilepsy, 10-13 nano-grams of tetanus toxin (Santa  
21 Cruz Biotechnology, CAS 676570-37-9) dissolved in 1.3 microliters PBS mixed with 2% BSA  
22 were injected into the left ventral hippocampus (AP -5.15, ML +5.35, DV -7.65 mm) through a  
23 30-gauge flexible cannula over 15 minutes.

1 Recording electrodes included stainless steel screws for measurements of electrocorticogram  
2 (ECoG) at coordinates of (AP +1.5, ML  $\pm$ 4 mm) and (AP -2, ML  $\pm$ 3 mm), and custom-made  
3 50  $\mu$ m (diameter) ultra-low impedance  $\mu$ RC, EIROF electrodes implanted in dorsal and ventral  
4 hippocampus (AP -2.5, ML  $\pm$ 2.0, DV -3.2 mm), (AP -3.9, ML  $\pm$ 2.2, DV -3.1 mm), (AP -5.15, ML  
5 -5.35, DV -7 mm), and (AP -6.0, ML 5.0, DV -5.5 mm) to provide differential measurements of  
6 the hippocampal local field potentials (LFP). For each hippocampal site, a bundle of two electrodes  
7 with ends 125-250  $\mu$  dorsally apart was used. All coordinates were Bregma referenced.

8 All rats received a lead in the precordium to monitor Electrocardiogram (ECG) activity. Electrodes  
9 were secured in place and electrically isolated via dental cement. The leads were then connected  
10 to the acquisition amplifier and all was encapsulated within a 3D printed headmount. At the  
11 completion of the surgery animals were returned to their individual homecages – standard  
12 autoclave-ready rat cages – with free access to food and water and maintained at a 12 hour light-  
13 dark cycle with lights on between 6 am and 6 pm.

14 Seven days post-recovery, rats were connected to a commutator at the top of the cage via a low-  
15 weight USB cable. A mini-computer (Raspberry Pi foundation, 3 model B) attached to the cage  
16 cover acquires data continuously to a network attached storage (NAS). A separate single-board  
17 computer (Raspberry Pi foundation, 3 model B) with a low-light level-compatible camera system  
18 similarly spools continuous, time-synchronized video data to the same NAS.

19 Animals were housed individually in custom-made plexiglass cages

## 20 Data Collection

21 For mice and rats all biopotentials were acquired at 24 bit resolution and 1 kHz sampling frequency  
22 (per channel) via our custom-made data acquisition system.

23 For mice acquisition system was designed to provide 8 channels of high quality biopotential  
24 recordings. The 24-bit digitization provides a dynamic range of 4.5 V with sub-microvolt

1 divisions. Therefore it accommodates the amplitude range and resolution to simultaneously resolve  
2 large shifts in tissue potentials (10-30 mV) associated with SD and normal activity in the range of  
3 few millivolts associated with field potentials. This feature complemented with DC-stable  $\mu$ RC  
4 electrodes will eliminate the need for analog high-pass filtering prior to digitization.

5 For rats, we extended the acquisition system to provide 16 channels and a 3-axis accelerometer  
6 and to fit within a 3D-printed head mounted box (amplifier size: 1"W×1"D×0.25"H).

7 The raw data contain the information in all frequencies, including bio-potentials from neural  
8 activity, spreading depolarization, and electrochemical changes.

#### 9 Data Analysis

10 All recorded data were inspected via in-house written Labview (National Instruments) and  
11 MATLAB (MathWorks Inc.) programs that allow for simultaneous re-referencing, filtering,  
12 spectral analysis and annotation. All data were originally referenced to a reference screw electrode.

13 For seizure and state of vigilance scoring, the raw ECoG and hippocampal depth recordings were  
14 band-pass filtered at 1-55 Hz and 1-125 Hz; respectively, to highlight field potentials and seizure  
15 dynamics. Electromyogram (EMG) and ECG data were band-pass filtered at 1-125 Hz to extract  
16 muscle activity and cardiac dynamics. 3-axis head acceleration was band-pass filtered at 1-100 Hz.

#### 17 Seizure Detection

18 For mice seizures were detected manually, from band-pass filtered EEG, using custom-written in-  
19 house software within Labview environment. Spontaneous seizure activity of more than 10  
20 seconds was identified and scored for origin and evolution pattern according to previously  
21 described criteria in Ssentongo et al. 2017. Inclusion criteria for putative seizure incidents were at  
22 least one low-noise hippocampal depth recording and at least one low-noise ECoG recording.  
23 Epilepsy criteria was defined as observation of at least 2 seizures at or after day 3 post-implant,  
24 and one seizure more than 26 days post-infection. All epileptic animals with at least one ECoG

1 and one hippocampal depth electrode with stable DC recordings throughout their lifetime were  
2 selected for further analysis.

3 For rats, seizures were detected automatically, from bandpass filtered EEG and head acceleration  
4 measurements, using in-house custom-written routines in Labview software and verified visually  
5 to determine precise onset and end times. Inclusion criteria for each hour of data analyzed were  
6 availability of at least one low-noise hippocampal LFP, at least one low-noise ECoG and at least  
7 one low-noise axis of head acceleration measurements. Spontaneous seizure activity of more than  
8 10 seconds was marked as a seizure.

#### 9 Spreading Depression Detection

10 A custom written MATLAB (Mathworks Inc.) script was used to find bouts of spreading  
11 depolarization. SD is characterized by significant negative DC changes in the signal. In order to  
12 detect such shifts, the raw EEG was low-pass filtered with a cutoff frequency of 2 Hz. We then  
13 calculated the first order time-derivative of the low-pass filtered signal and marked any instance  
14 of threshold ( $= 4 \times$  standard deviation from the mean) crossing as an indicator of a SD bout. Time-  
15 series of detected SD events were visually inspected and verified to achieve temporal accuracy in  
16 SD end times which were identified as when DC potential recovered to the pre-seizure baseline.

#### 17 DC Artifacts:

18 The changes in DC potential might not all be due to physiological phenomena. Transient changes  
19 in connectivity can cause transient, sharp shifts in electrode potential. These events are often  
20 caused by mechanical factors that temporarily affect the amplifier-headmount connection such as  
21 animal handling during cleaning and measurements of parasitemia levels. During these artifacts,  
22 the DC potential rapidly rises and then recovers to its baseline value through a short recharge  
23 period.

1 Our SD detection algorithm did not account for such DC shifts. Thus, time-series of detected SD  
2 events were visually inspected and verified to account for false detections. These transient  
3 incidents are distinguishable from baseline DC potential fluctuations because of their relatively  
4 larger amplitude and from SD-like events due to their relatively shorter duration.

#### 5 Included Data

6 In both animal models of epilepsy, animals were included for further analysis if they had at least  
7 one ECoG and one hippocampal depth recordings with sufficient stability. As described  
8 previously, “sufficient stability” is defined as having baseline (low-frequency) fluctuations with  
9 amplitudes substantially less than 10 mV over hour-long periods. Therefore, all included animals  
10 had stable DC recordings throughout their lifetime.

11 For both models, we included epileptic animals (ones that experienced spontaneous, recurrent  
12 seizures according to the criteria previously described) and control animals. Controls included both  
13 animals that received neurological insult (CM or TeTX) and did not develop epilepsy and ones  
14 that did not receive CM or TeTX.

#### 15 Post-Cerebral Malaria Epilepsy Model:

16 Overall data were collected from 21 post-CM epileptic mice with 1139 days of continuous  
17 recordings. Control data included uninfected control animals with no seizures (17 mice with over  
18 820 cumulative recording days), and animals rescued from CM that did not develop seizures (6  
19 mice with 282 cumulative recording days).

#### 20 Rat Tetanus Toxin Model of Temporal Lobe Epilepsy:

21 Overall data were collected from 5 TeTX epileptic rats with 124 days continuous recordings.  
22 Control data included 2 rats with 74 recording days each that did not receive TeTX injections and  
23 one rat that received TeTX injection but did not develop epilepsy with 80 days of recording.  
24 Collectively, the two models account for 2593 days of full-time continuous measurements.

1 Hardware Validation:

2 The large slow shifts in the tissue potential associated with SD reside in the very low frequency  
3 (1-100 mHz) ranges. Therefore, in order to capture these events the measurements need to be free  
4 of the electrode-tissue electrochemical polarization driven by the input current of the amplifier.  
5 This is in addition to the digitization range and resolution required to simultaneously record SD  
6 and field potentials.

7 For evaluation of electrode polarization under DC potential changes we prepared a conductive  
8 medium from 0.09% NaCl solution (10 times weaker than standard physiological saline). The  
9 solution was then poured into the experiment chamber which is built from plexiglass (blue area in  
10 Fig. 2A). The two conductive sections (area =  $2 \times 4 \text{ cm}^2$  and  $2 \times 0.5 \text{ cm}^2$ ) are separated from one  
11 another with molding clay (green piece) and the only electrical connectivity is from a glass pipette  
12 filled with 0.09% saline.

13 Within this setup, a spatially uniform, AC electric field was introduced by passing current (Analog  
14 Stimulus Isolator, AM Systems Model 2200) between a pair of large platinum plates ( $0.7 \times 1.7 \text{ cm}^2$ )  
15 embedded on either end of the chamber relatively far from the electrodes (distance between  
16 plates = 6 cm). Test electrodes were embedded inside the chamber at known distances from one  
17 another. Measurements were referenced to a stainless steel screw electrode placed in the chamber  
18 floor (one of the red circles in Fig. 2A).

19 The electrodeposited iridium oxide films (EIROF) are known to be pH sensitive<sup>26</sup>. Physiological  
20 brain pH variations occur in the time-scale of seconds to minutes. Therefore, our measurements in  
21 the very low frequency ranges are potentially combinations of changes induced by electrochemical  
22 reactions (pH) and electrical fields induced by depolarization of neural populations (SD).

23 We characterized the pH response of the custom-made EIROF deposited  $50 \mu\text{m}$  micro-reaction  
24 chamber ( $\mu\text{RC}$ ) electrodes in the physiologically relevant pH range of 6-8. The electrodes were

1 placed in the Britton-Robinson buffer solution while drop-wise addition of 0.2 M solutions of  
2 NaOH and H<sub>2</sub>SO<sub>4</sub> set the appropriate pH range (measured via a calibrated pH-meter, Anaheim  
3 Scientific P771). The test electrodes were all referenced to a pH-insensitive Ag/AgCl pellet  
4 electrode (AM Systems, Catalog #550008). The pH-insensitivity of the Ag/AgCl pellet was  
5 confirmed via measurements against a double junction Ag/AgCl reference electrode (Beckman  
6 Coulter, 3.5 M KCl, Item #A57189). We found the pH sensitivity of our custom-made EIROF  
7 deposited  $\mu$ RC electrodes to be 70 mV/decade at body temperature of 37°C (data not shown).

8 Measurement of Spreading Depolarization in Rat Brain Slice:  
9 In order to further validate our in vivo potential measurement of SD, we acutely induced cortical  
10 SD and measured tissue potential with our recording system designed and utilized for chronic  
11 measurements in epileptic rats (as previously described in Methods). The slice preparation and  
12 induction of cortical SD were in the context of experiments detailed in <sup>32</sup>. We assembled an array  
13 of  $\mu$ RC EIROF electrodes according to methods described in <sup>23</sup>. The assembly was then advanced  
14 into the slice while electrode potentials were continuously recorded. Shown in Fig. S1A is the  
15 position of electrodes with respect to the cortex. The colored crosses correspond to the colored  
16 traces of electrode potential time-series in Fig. S1C. The large negative deflection in each  
17 electrode potential was concurrent with the time SD reached the electrode as shown in Fig. S1B  
18 for the three of the recording electrodes (blue, green, black crosses in Fig. S1B).

19 Statistical Analysis:

20 The fraction of seizure-associated spreading depolarization events, 33% and 38% for TeTX and  
21 post-CM model respectively, is the count of seizures with SD from all observed seizures. These  
22 counts are estimates following the binomial count statistics. Therefore, the propagated error for  
23 these estimates is  $\sqrt{f(1-f)/N}$ , where N is the sample size and f is the estimated



1  $\frac{\textit{seizure-associated SD}}{\textit{all seizures}}$ . The propagated estimation error was 0.02 and 0.01 for TeTX and post-CM

2 model respectively.

3

4

## 1 References

- 2 1. Berger, H. Über das elektrenkephalogramm des menschen. *Arch. Psychiatr. Nervenkr.* **98**,  
3 231–254 (1933).
- 4 2. Leao, A. A. P. SPREADING DEPRESSION OF ACTIVITY IN THE CEREBRAL  
5 CORTEX. *J. Neurophysiol.* **7**, 359 LP-390 (1944).
- 6 3. Lauritzen, M. Pathophysiology of the migraine aura: The spreading depression theory.  
7 *Brain* **117**, 199–210 (1994).
- 8 4. Lauritzen, M. *et al.* Clinical relevance of cortical spreading depression in neurological  
9 disorders: Migraine, malignant stroke, subarachnoid and intracranial hemorrhage, and  
10 traumatic brain injury. *Journal of Cerebral Blood Flow and Metabolism* **31**, 17–35 (2011).
- 11 5. Rogawski, M. Migraine and epilepsy—shared mechanisms within the family of episodic  
12 disorders. *Jasper's Basic Mech. Epilepsies* (2012). doi:NBK98193 [bookaccession]
- 13 6. Aiba, I. & Noebels, J. L. Spreading depolarization in the brainstem mediates sudden  
14 cardiorespiratory arrest in mouse SUDEP models. *Sci. Transl. Med.* **7**, 282ra46-282ra46  
15 (2015).
- 16 7. Wei, Y., Ullah, G. & Schiff, S. J. Unification of Neuronal Spikes, Seizures, and Spreading  
17 Depression. *J. Neurosci.* **34**, 11733–11743 (2014).
- 18 8. Ullah, G., Wei, Y., Dahlem, M. A., Wechselberger, M. & Schiff, S. J. The Role of Cell  
19 Volume in the Dynamics of Seizure, Spreading Depression, and Anoxic Depolarization.  
20 *PLoS Comput. Biol.* **11**, (2015).
- 21 9. Ssentongo, P. *et al.* A Murine Model to Study Epilepsy and SUDEP Induced by Malaria  
22 Infection. *Sci. Rep.* **7**, 43652 (2017).
- 23 10. Sedigh-Sarvestani, M. *et al.* Rapid eye movement sleep and hippocampal theta oscillations  
24 precede seizure onset in the tetanus toxin model of temporal lobe epilepsy. *J. Neurosci.*  
25 **34**, 1105–14 (2014).
- 26 11. Jefferys, J. G. R., Borck, C. & Mellanby, J. Chronic focal epilepsy induced by  
27 intracerebral tetanus toxin. *Ital. J. Neurol. Sci.* (1995). doi:10.1007/BF02229071
- 28 12. Canals, S. Longitudinal Depolarization Gradients Along the Somatodendritic Axis of CA1  
29 Pyramidal Cells: A Novel Feature of Spreading Depression. *J. Neurophysiol.* **94**, 943–951  
30 (2005).
- 31 13. Kunkler, P. E. & Kraig, R. P. Hippocampal spreading depression bilaterally activates the  
32 caudal trigeminal nucleus in rodents. *Hippocampus* **13**, 835–844 (2003).
- 33 14. Olsson, T. *et al.* Cell swelling, seizures and spreading depression: An impedance study.  
34 *Neuroscience* **140**, 505–515 (2006).
- 35 15. Martens-Mantai, T., Speckmann, E. J. & Gorji, A. Propagation of cortical spreading  
36 depression into the hippocampus: The role of the entorhinal cortex. *Synapse* **68**, 574–584  
37 (2014).

- 1 16. Cain, S. M. *et al.* In vivo imaging reveals that pregabalin inhibits cortical spreading  
2 depression and propagation to subcortical brain structures. *Proc. Natl. Acad. Sci.* (2017).  
3 doi:10.1073/pnas.1614447114
- 4 17. Van Harreveld, A. & Stamm, J. S. Spreading cortical convulsions and depressions. *J.*  
5 *Neurophysiol.* **16**, 352–66 (1953).
- 6 18. Hartings, J. A. *et al.* Spreading Depolarizations and Late Secondary Insults after  
7 Traumatic Brain Injury. *J. Neurotrauma* (2009). doi:10.1089/neu.2009.0961
- 8 19. Herreras, O. Local Field Potentials: Myths and Misunderstandings. *Front. Neural Circuits*  
9 (2016). doi:10.3389/fncir.2016.00101
- 10 20. Shanmugasundaram, B. & Gluckman, B. J. Micro-reaction chamber microelectrodes  
11 especially for neural and biointerfaces. (2017).
- 12 21. Bahari, F., Ssentongo, P., Schiff, S. J. & Gluckman, B. J. A Brain-Heart Biomarker for  
13 Epileptogenesis. *J. Neurosci.* (2018).
- 14 22. Richardson, K. A., Schiff, S. J. & Gluckman, B. J. Control of Traveling Waves in the  
15 Mammalian Cortex. *Phys. Rev. Lett.* **94**, 028103 (2005).
- 16 23. Pinto, D. J. & Ermentrout, G. B. Spatially Structured Activity in Synaptically Coupled  
17 Neuronal Networks: I. Traveling Fronts and Pulses. *SIAM J. Appl. Math.* (2001).  
18 doi:10.1137/S0036139900346453
- 19 24. Tschirgi, R. D., Inanaga, K., Taylor, J. L., Walker, R. M. & Sonnenschein, R. R. Changes  
20 in Cortical pH and Blood Flow Accompanying Spreading Cortical Depression and  
21 Convulsion. *Am. J. Physiol. Content* **190**, 557–562 (1957).
- 22 25. Somjen, G. G. Acidification of interstitial fluid in hippocampal formation caused by  
23 seizures and by spreading depression. *Brain Res.* **311**, 186–188 (1984).
- 24 26. Papeschi, G., Bordi, S., Beni, C. & Ventura, L. Use of an iridium electrode for direct  
25 measurement of pI of proteins after isoelectric focusing in polyacrylamide gel. *Biochim.*  
26 *Biophys. Acta - Protein Struct.* **453**, 192–199 (1976).
- 27 27. Izhikevich, E. M. Neural Excitability, Spiking and Bursting. *Int. J. Bifurc. Chaos* **10**,  
28 1171–1266 (2000).
- 29 28. Rinzel, J. & Ermentrout, G. B. Analysis of neural excitability and oscillations. *Methods in*  
30 *neuronal modeling* (1989).
- 31 29. Cressman, J. R., Ullah, G., Ziburkus, J., Schiff, S. J. & Barreto, E. The influence of  
32 sodium and potassium dynamics on excitability, seizures, and the stability of persistent  
33 states: I. Single neuron dynamics. *J. Comput. Neurosci.* **26**, 159–170 (2009).
- 34 30. Barreto, E. & Cressman, J. R. Ion concentration dynamics as a mechanism for neuronal  
35 bursting. *J. Biol. Phys.* (2011). doi:10.1007/s10867-010-9212-6
- 36 31. Wei, Y., Ullah, G., Ingram, J. & Schiff, S. J. Oxygen and seizure dynamics: II.  
37 Computational modeling. *J. Neurophysiol.* **112**, 213–223 (2014).

- 1 32. Whalen, A. J. *et al.* Control of Spreading Depression with Electrical Fields. *Sci. Rep.*  
2 (2018). doi:10.1038/s41598-018-26986-1

3

4

5

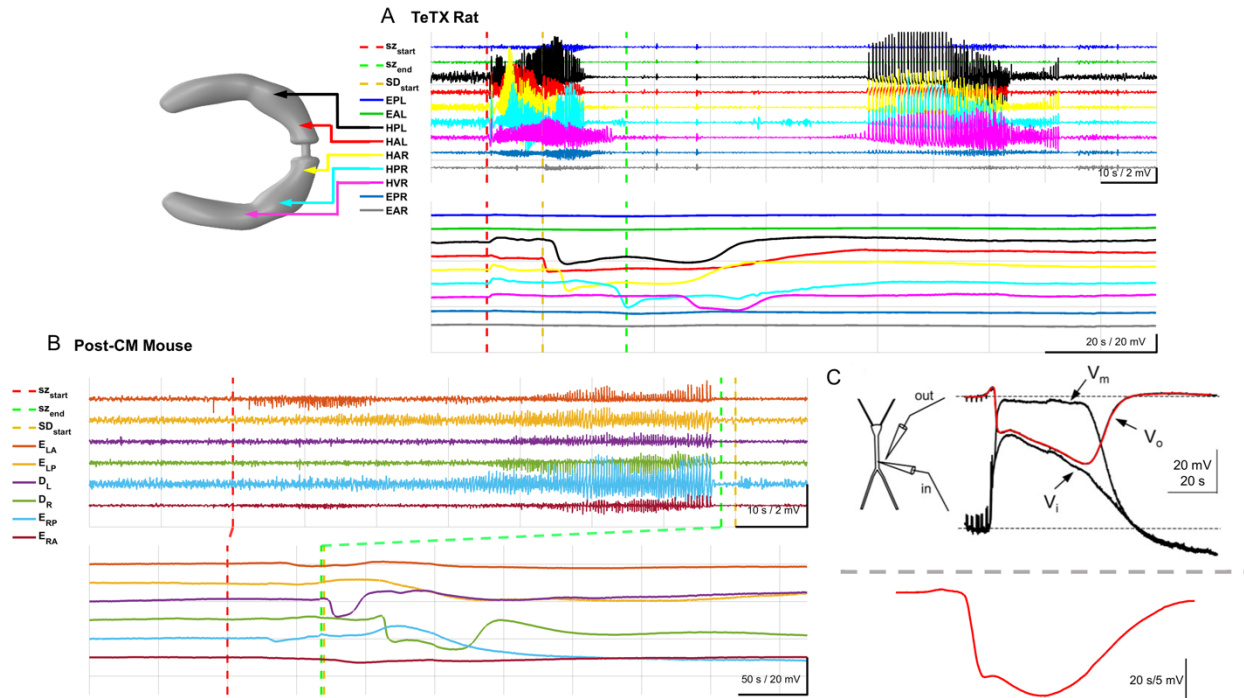

1

2 **Figure 1. Examples of SD from chronic Recordings. (A)** Spontaneous seizure with SD activity in the

3 hippocampus of a rat under the TeTX model of temporal lobe epilepsy. During the large negative deflection

4 in DC potential associated with SD (bottom traces), band-pass filtered field potentials (top traces) are

5 suppressed. Filter settings for traces shown: Seizure traces band-pass 1-50 Hz; SD traces low-pass filter

6 below 2 Hz; EPL, ECoG posterior left; EAL, ECoG anterior left; EPR, ECoG posterior right; EAR, ECoG

7 anterior right; HPL, hippocampal posterior left; HAL, hippocampal anterior left; HAR hippocampal

8 anterior right; HPR, hippocampal posterior right; HVR, hippocampal ventral right. **(B)** Example observed

9 from a mouse model of post-cerebral malaria epilepsy. SD waves are observed in the measured DC potential

10 (bottom traces) from hippocampal leads following a seizure (top traces). Seizure onset and offset are

11 marked by the red and green dashed lines, respectively. The gold line marks the onset of the first seizure-

12 associated SD. Filter settings for traces shown: Seizure traces band-pass 1-50 Hz; SD traces low-pass filter

13 below 2 Hz. D<sub>L</sub>, depth hippocampus left and D<sub>R</sub>, depth hippocampus right, E<sub>LA</sub>, ECoG left anterior, E<sub>RA</sub>,

14 ECoG right anterior and E<sub>LP</sub>, ECoG left posterior, E<sub>RP</sub>, ECoG right posterior. **(C)** Shape of experimentally

1 induced hippocampal SD (Top; adapted with permission from Canals et al., 2006) and (Bottom, in house  
2 slice electrophysiology recordings with the DC-sensitive acquisition system, for more details see Fig. S1).

3

4

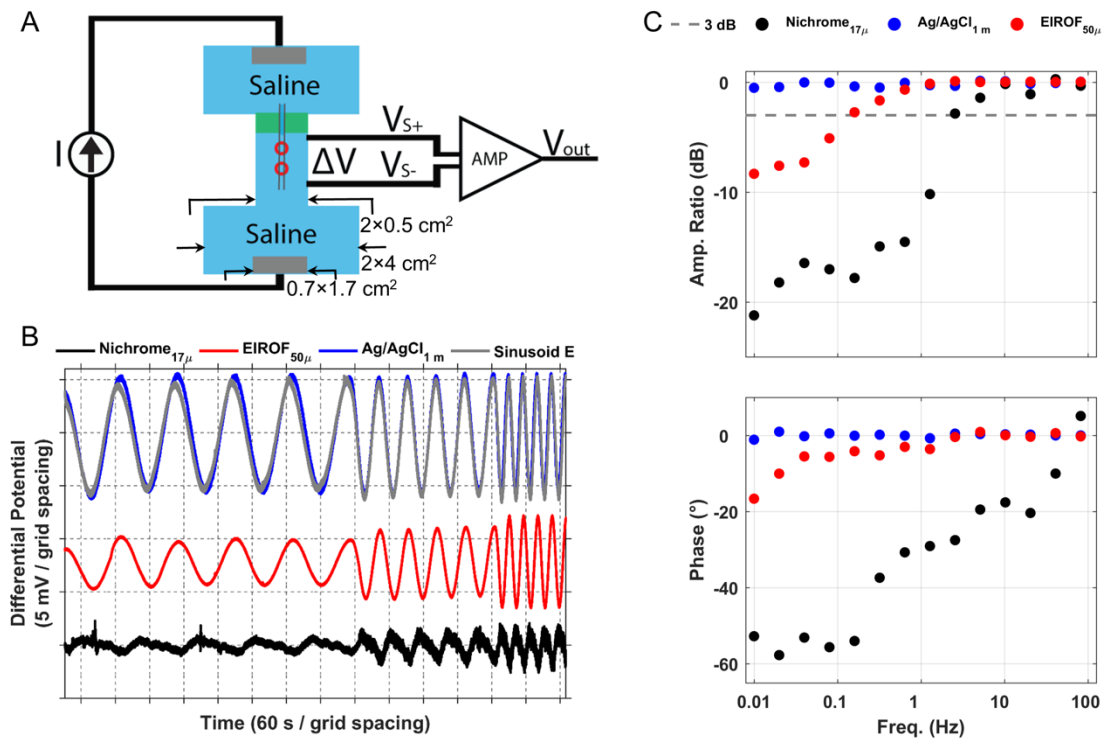

1 **Figure 2. Hardware validation for stable DC and AC measurements. (A) Schematic of the**  
2 **experimental chamber for in vitro hardware validation.** The chamber is built from plexiglass and  
3 contains 0.09% saline solution (blue area). The two sides of the chamber are electrically isolated from one  
4 another via clay (green area) and the only connection is through a pipette (black lines) that forms a salt  
5 bridge. The test electrodes are placed on either side of the chamber in the conductive solution. Two screw  
6 electrodes (indicated by the red circles) are used as reference and ground. An electric field is imposed by a  
7 set of platinum electrodes (indicated by the gray boxes) on the two sides of the chamber. Test electrodes,  
8 reference and ground screws are connected to the acquisition system. The sinusoidal electric field with  
9 different frequencies is applied by driving current from an isolated current supply (Analog Stimulus  
10 Isolator, AM Systems Model 2200) through platinum plates at either end of the chamber away from the  
11 testing electrodes. Testing electrodes are matched pairs of 50 μm (in diameter) micro-reaction chamber  
12 EIROF, 1 mm x 2.5 mm silver/silver chloride pellets (AM Systems, Catalog #550010), and 17 μm  
13 Nichrome wires at variable known distances apart. **(B) In vitro measurements of phase and amplitude**  
14 **of the electrode potentials across applied near-DC sinusoid electric field.** The large Ag/AgCl pellet

1 (blue trace) phase and amplitude follow the sinusoid AC field (gray trace) at all frequencies shown here  
2 (0.01, 0.02, 0.04 Hz). While the EIROF electrodes (red trace) show some level of degradation both in phase  
3 and amplitude for these very low frequencies, they still sufficiently track the field. However the Nichrome  
4 electrodes (black trace) show a large lag and distorted signal. **(C) Low frequency sensitivity of the**  
5 **recording system.** The EIROF can sense and track the field across a wide range of frequencies with only  
6 minor attenuation at very low frequencies, in contrast to the much smaller and higher impedance Nichrome  
7 electrode that inherently acts as a high-pass filter for the tissue potentials and shows substantial phase and  
8 amplitude distortion.

9

10



**A TeTX Rat**

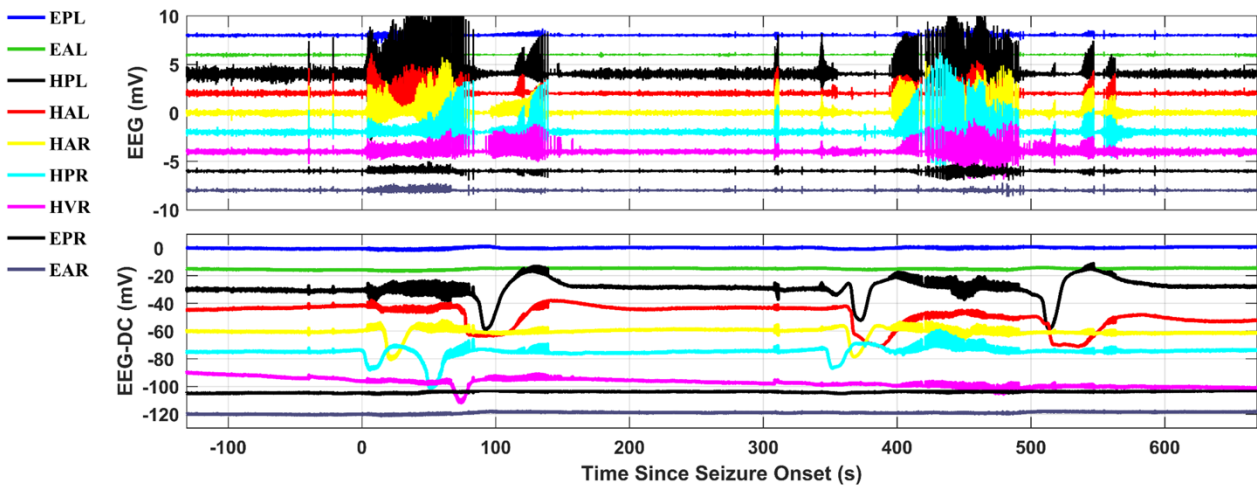

**B TeTX Rat**

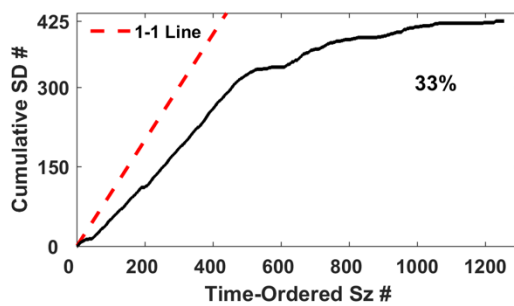

**C Post-CM Mouse**

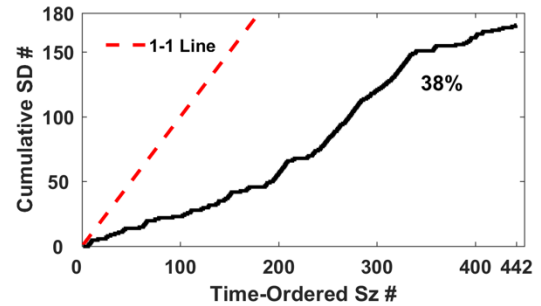

1 **Figure 3. SD is associated with a substantial percentage of seizures and mediates seizure clusters in**  
2 **rat TeTX model of temporal lobe epilepsy.** We identified seizure clusters as seizure events occurring  
3 within at least 10 minutes of each other. **(A)** Two seizures occur within 5 minutes with SDs occurring during  
4 and prior to seizures; the posterior and anterior left hippocampal leads capture SDs immediately prior to  
5 and after the second seizure (HPL and HAL traces). **(B, C)** Cumulative count of seizure-associated SDs as  
6 a function of seizures rank-ordered by time of occurrence in each epileptic model. Seizure-associated SDs  
7 occurred in 33% of the collected seizures in epileptic rats **(B)** and 38% of the collected seizures in epileptic  
8 mice **(C)**. Estimated rates have propagated errors less than 2% (see methods).

9 (Top traces A) Bandpass filtered field potentials. (Bottom traces A) Raw (unfiltered) hippocampal and  
10 cortical measurements. Filter settings for traces shown: Seizure traces band-pass 1-50 Hz; SD traces no  
11 low-pass filter. EPL; ECoG posterior left, EAL; anterior left, HPL; hippocampal posterior left LFP, HAL;  
12 hippocampal anterior left LFP, HAR; hippocampal anterior right LFP, HPR; hippocampal posterior right

- 1 LFP, HVR; hippocampal ventral right LFP (contralateral side to the tetanus toxin lesion), EPR; ECoG
- 2 posterior right, EAR; ECoG anterior right.

3

4

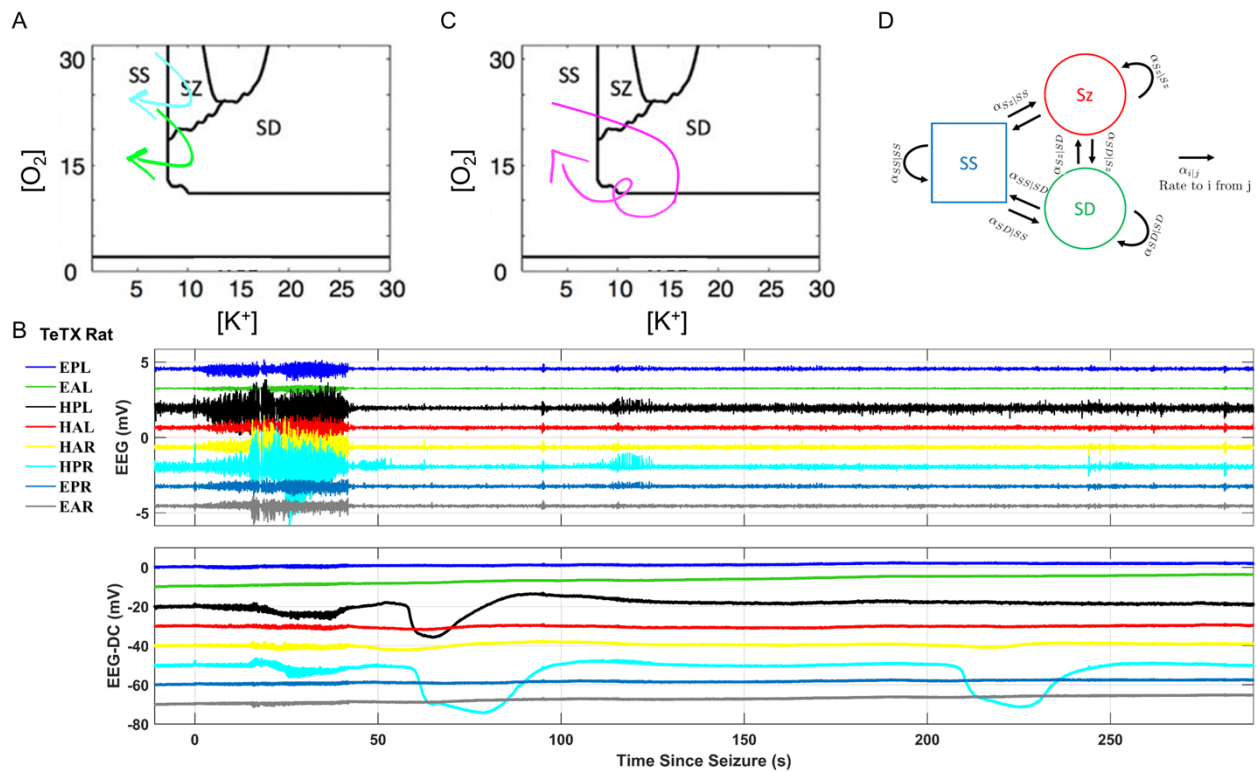

1 **Figure 4. Bifurcations of the neuronal transmembrane dynamics.** Based on computational models of  
 2 the neuronal dynamics, the system (brain) can transition between steady state (SS), spreading depolarization  
 3 (SD), and seizures (SZ). (A, C) Two-parameter bifurcation based on extracellular oxygen and potassium  
 4 concentrations; adapted from (Wei et al. 2014). Experimental measurements are described by state-space  
 5 trajectories such as SS→SZ→SS (cyan arrow in A), SS→SZ→SD→SS (green arrow in A and traces in  
 6 Fig. 1A, Fig. S1B-C), and SS→SZ→SD→SS→SD→SS (magenta arrow in C, and cyclic SD in traces in  
 7 B). These transitions can be cast into a discrete state transition model (D) to further calculate the transition  
 8 probabilities based on variables such as extracellular oxygen, potassium concentrations, and cellular  
 9 volume fraction (Ullah et al., 2015).

10 (Top traces B) Bandpass filtered field potentials. (Bottom traces B) Raw (unfiltered) hippocampal and  
 11 cortical measurements. Filter settings for traces shown: Seizure traces band-pass 1-50 Hz; SD traces no  
 12 low-pass filter. EPL; ECoG posterior left, EAL; anterior left, HPL; hippocampal posterior left LFP, HAL;

- 1 hippocampal anterior left LFP, HAR; hippocampal anterior right LFP, HPR; hippocampal posterior right
- 2 LFP, EPR; ECoG posterior right, EAR; ECoG anterior right.

3

1 Extended Data

2

3

4

5

6

7

8

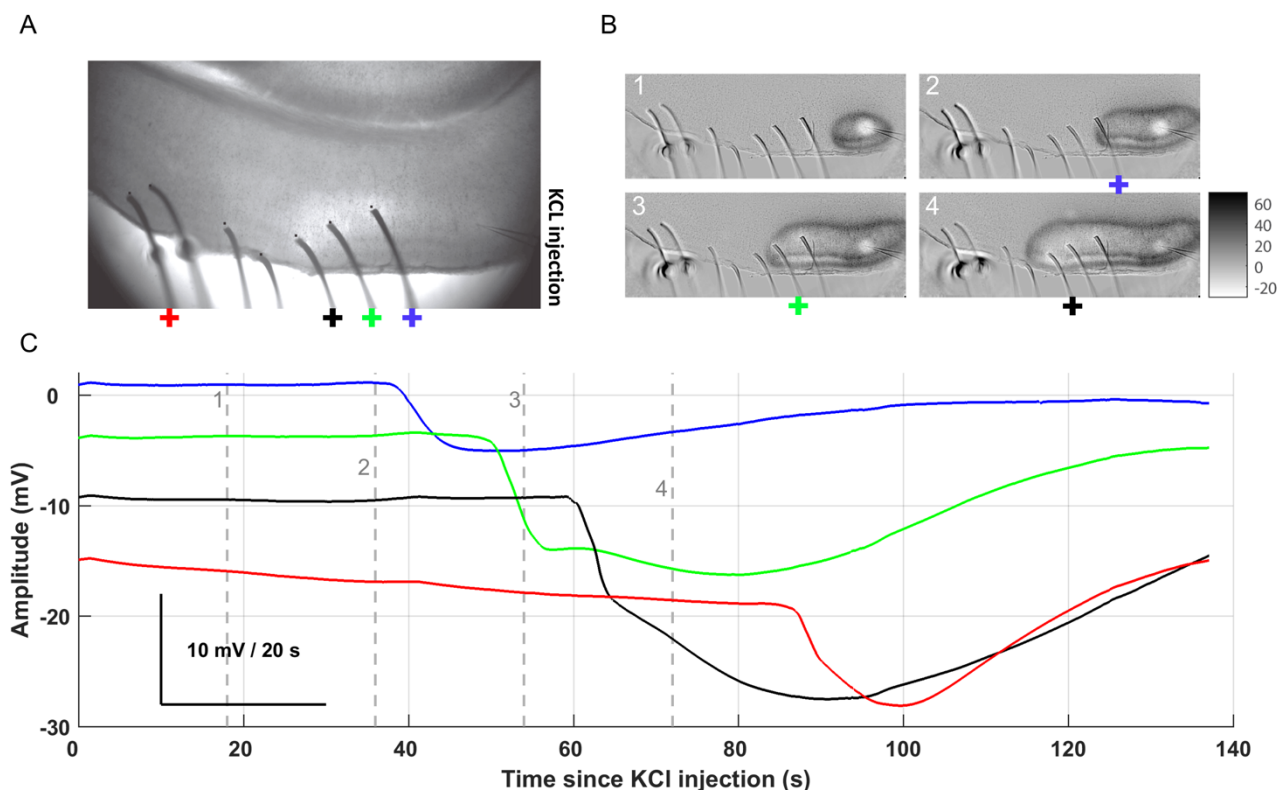

1 **Supplementary Figure 1: Measurement of induced SD in coronal slice of rat brain.** Measurement of  
2 tissue electrical potential was performed with our recording system designed for chronic recordings from  
3 TeTX epileptic rats, in the context of slice electrophysiology experiments described in (Whalen et al.,  
4 2018). (A) Micro-reaction chamber EIROF electrodes were placed in the experimental chamber such that  
5 their tips touched the cortex (array was designed as in (Pinto and Ermentrout, 2001)). The spreading  
6 depolarization was induced using pipette injection of KCl. Cortical spreading depolarization was tracked  
7 using intrinsic optical imaging (IOS) as described in (Whalen et al. 2018) (B) and measurement of electrical  
8 tissue potential via the electrodes that were in tissue (each colored cross in A, B corresponds to the same  
9 color time-series in C) (C). The frames captured in (B) are normalized to the background (first 100 frames  
10 prior to injection) and are 18 seconds apart in time. The color indicates intensity differences from the  
11 background. Each frame corresponds to a numbered gray dashed line in (C) and the colored crosses  
12 correspond to the potential traces.

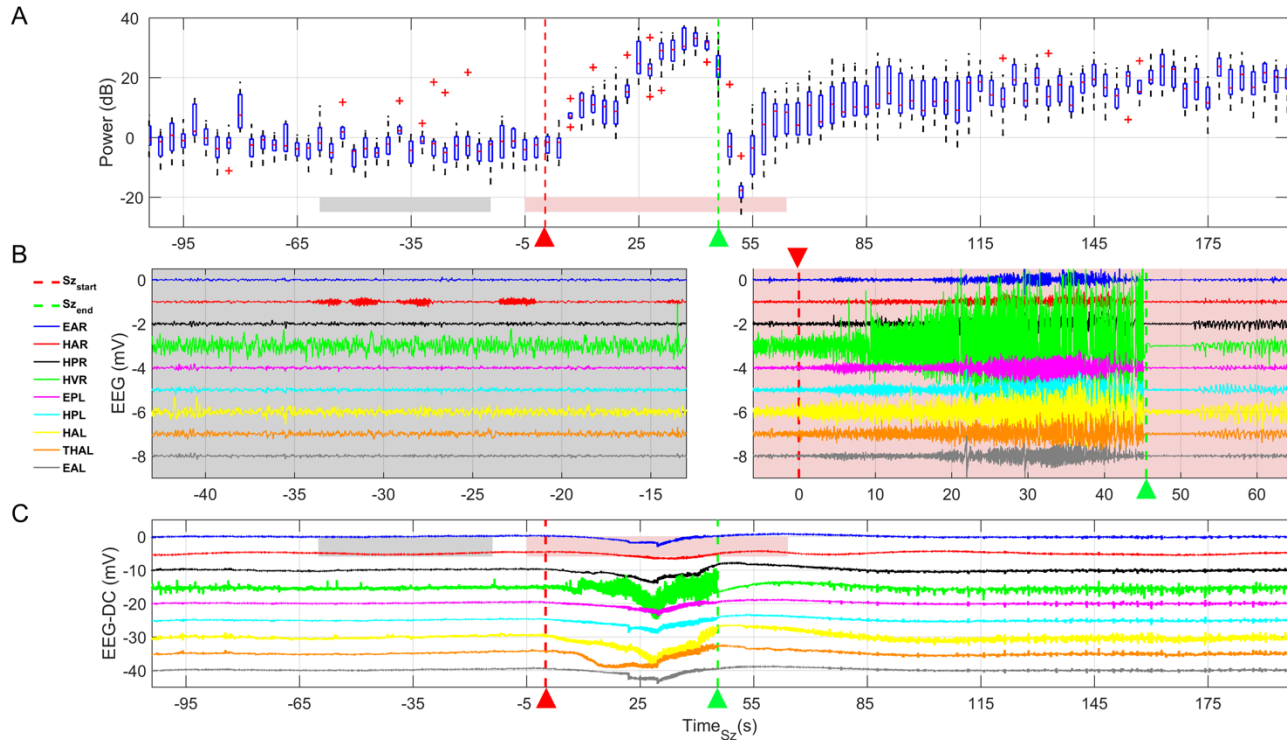

1 **Supplementary Figure 2: Post-ictal generalized suppression occurs in the absence of spreading**  
2 **depolarization. (A)** Power in all hippocampal and cortical channels is normalized to the baseline power  
3 calculated from one hour of recordings. Normalized power distribution rises at the beginning of the seizure  
4 and decreases much (20 dB) below the baseline values (30 seconds of baseline is highlighted via the gray  
5 box) immediately after the seizure; similar to postictal suppression descriptions. Duration between five  
6 seconds prior to the seizure and 15 seconds after the seizure is highlighted via the red box. Seizure onset  
7 and offset are marked by the red and green dashed lines with triangle markers. **(B)** Band-pass filtered EEG  
8 prior to the seizure indicates no large amplitude abnormal/epileptic like activity (gray panel). A short period  
9 of postictal generalized EEG suppression (PGES) is apparent from the flat EEG immediately after the  
10 seizure ends (after the green dashed line in red panel). This period lasts for approximately 10 seconds after  
11 which the EEG recovers to baseline activity. **(C)** Seizures are concurrent with small shifts in tissue potential  
12 as indicated in the raw EEG (EEG-DC) and previous reports (Mayanagi and Walker, 1975; Mader et al.,  
13 2005). The tissue potential returns to baseline by the end of the seizure, and there is no large negative shift  
14 during the postictal suppression of EEG activity. This is consistent with there NOT being SD concurrent  
15 with the PGES. Red and green dashed lines mark the onset and offset of the seizure, respectively.

1 Filter settings for traces shown: EEG traces were band-pass filtered (1-50 Hz) prior to calculation of power  
2 (A) and for presentation (B); DC traces in (C) were not filtered. EAR; ECoG anterior right, HAR;  
3 hippocampal anterior right LFP, HPR; hippocampal posterior right LFP, HVR; hippocampal ventral right  
4 LFP (contralateral side to the tetanus toxin lesion), EPL; ECoG posterior left, HPL; hippocampal posterior  
5 left LFP, HAL; hippocampal anterior left LFP, THAL; ventrolateral thalamic anterior left, EAL; ECoG  
6 anterior left.

7

8



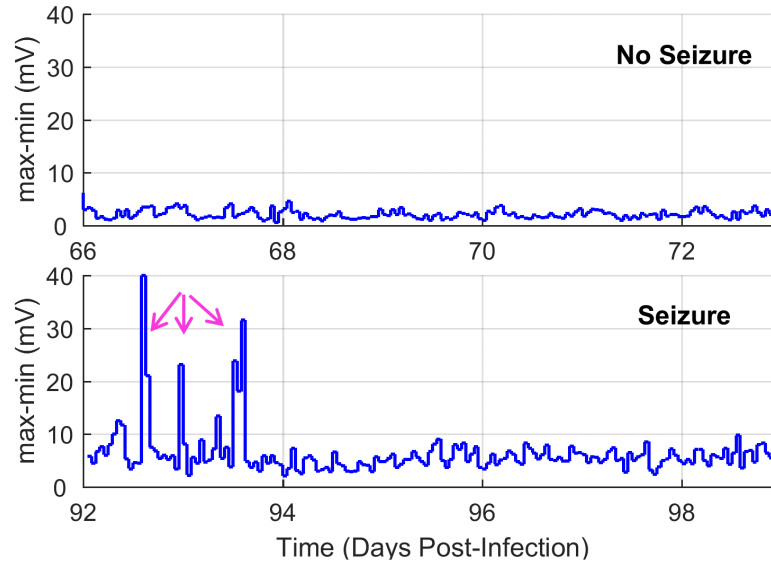

1

2 **Supplementary Figure 3: Stability of *in vivo* DC measurements over periods of days to weeks.** In each  
3 hour long block of data, the unfiltered potential range (max-min) for each hippocampal depth electrode ( $D_L$   
4 and  $D_R$ ) was calculated. The range of the referential  $D_L$  measurements over 8 consecutive days (top trace)  
5 remains stable with small fluctuations between 0.56–6.23 mV during a seizure free period of 8 days.  
6 However the SD episodes (magenta arrows) associated with seizures in 3 different days during an 8-day  
7 period (bottom trace) cause large fluctuations in the DC potential. Traces are from one epileptic animal.

8

9

## TeTX Rat

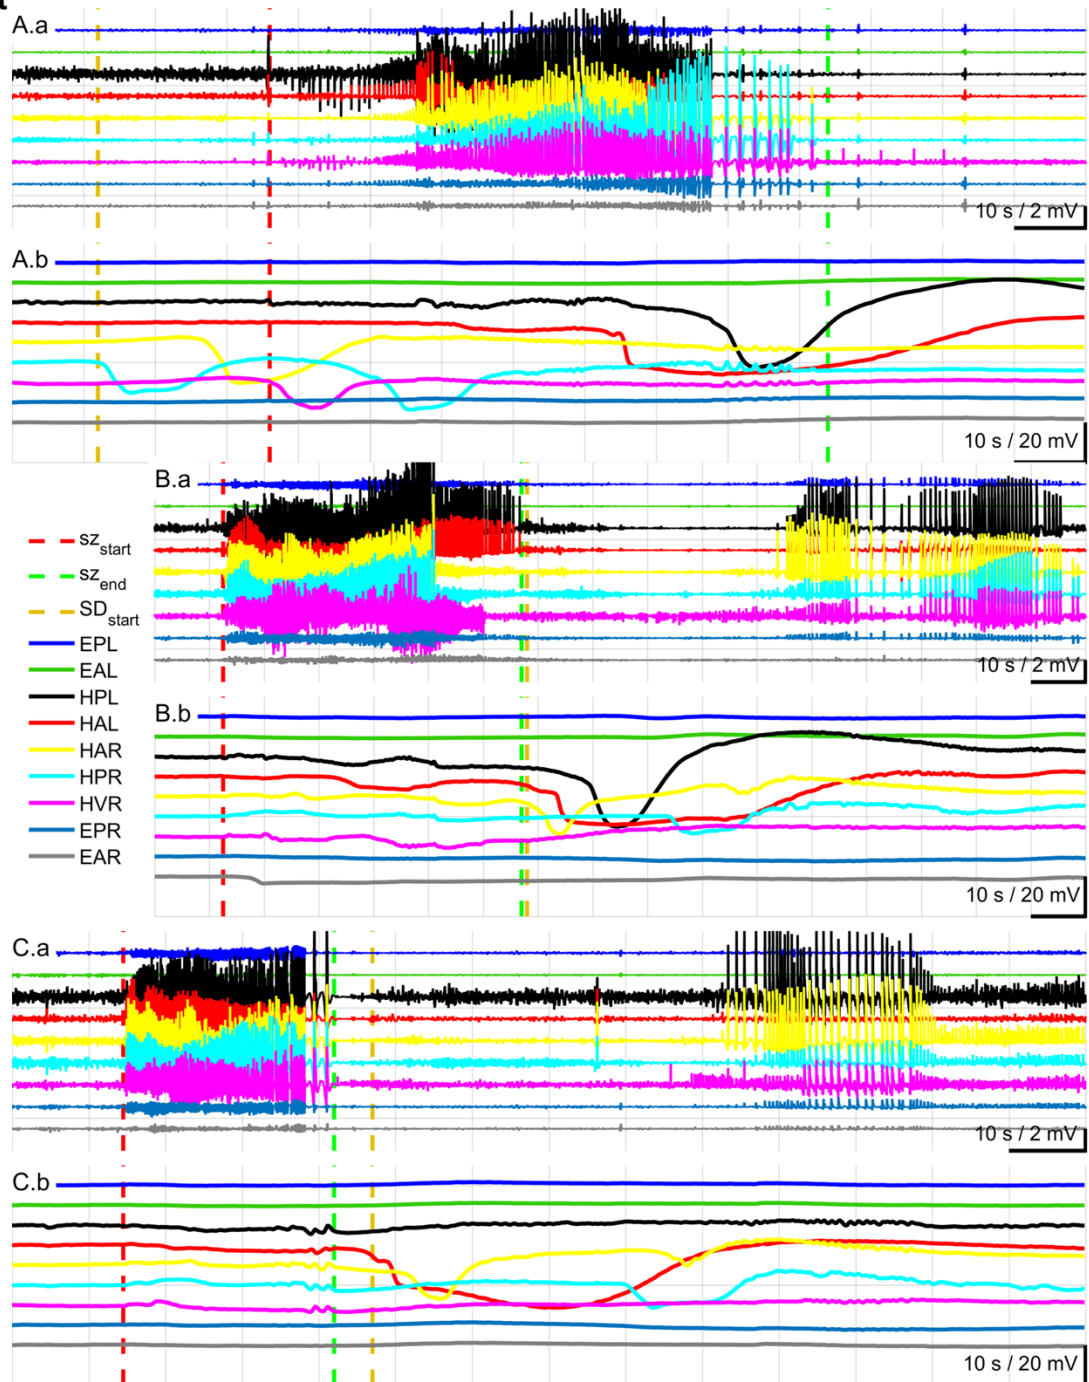

- 1 **Supplementary Figure 4: Types of spreading depolarization in the rat TeTX model of temporal lobe**
- 2 **epilepsy.** Negative DC deflections were observed across dorsal-ventral hippocampi in the electrodes
- 3 recording local field potentials (LFP). Spreading depolarization either occurred prior to and during seizures
- 4 in seizure clusters suggesting that SD can mediate the seizures (**A**) and/or occur following seizures (**B, C**).

1 Red and green dashed lines mark the onset and offset of the seizure. The onset of the first measured SD in  
2 each panel is marked by a gold dashed line.

3 (Top traces) Bandpass filtered field potentials. (Bottom traces) Raw (unfiltered) hippocampal and cortical  
4 measurements. Filter settings for traces shown: Seizure traces band-pass 1-50 Hz; SD traces low-pass filter  
5 below 2 Hz. EPL; ECoG posterior left, EAL; anterior left, HPL; hippocampal posterior left LFP, HAL;  
6 hippocampal anterior left LFP, HAR; hippocampal anterior right LFP, HPR; hippocampal posterior right  
7 LFP, HVR; hippocampal ventral right LFP (contralateral side to the tetanus toxin lesion), EPR; ECoG  
8 posterior right, EAR; ECoG anterior right.

9 Seizures in (A.a, B.a, C.a) correspond to SD events in (A.b, B.b, C.b) respectively.

10

11

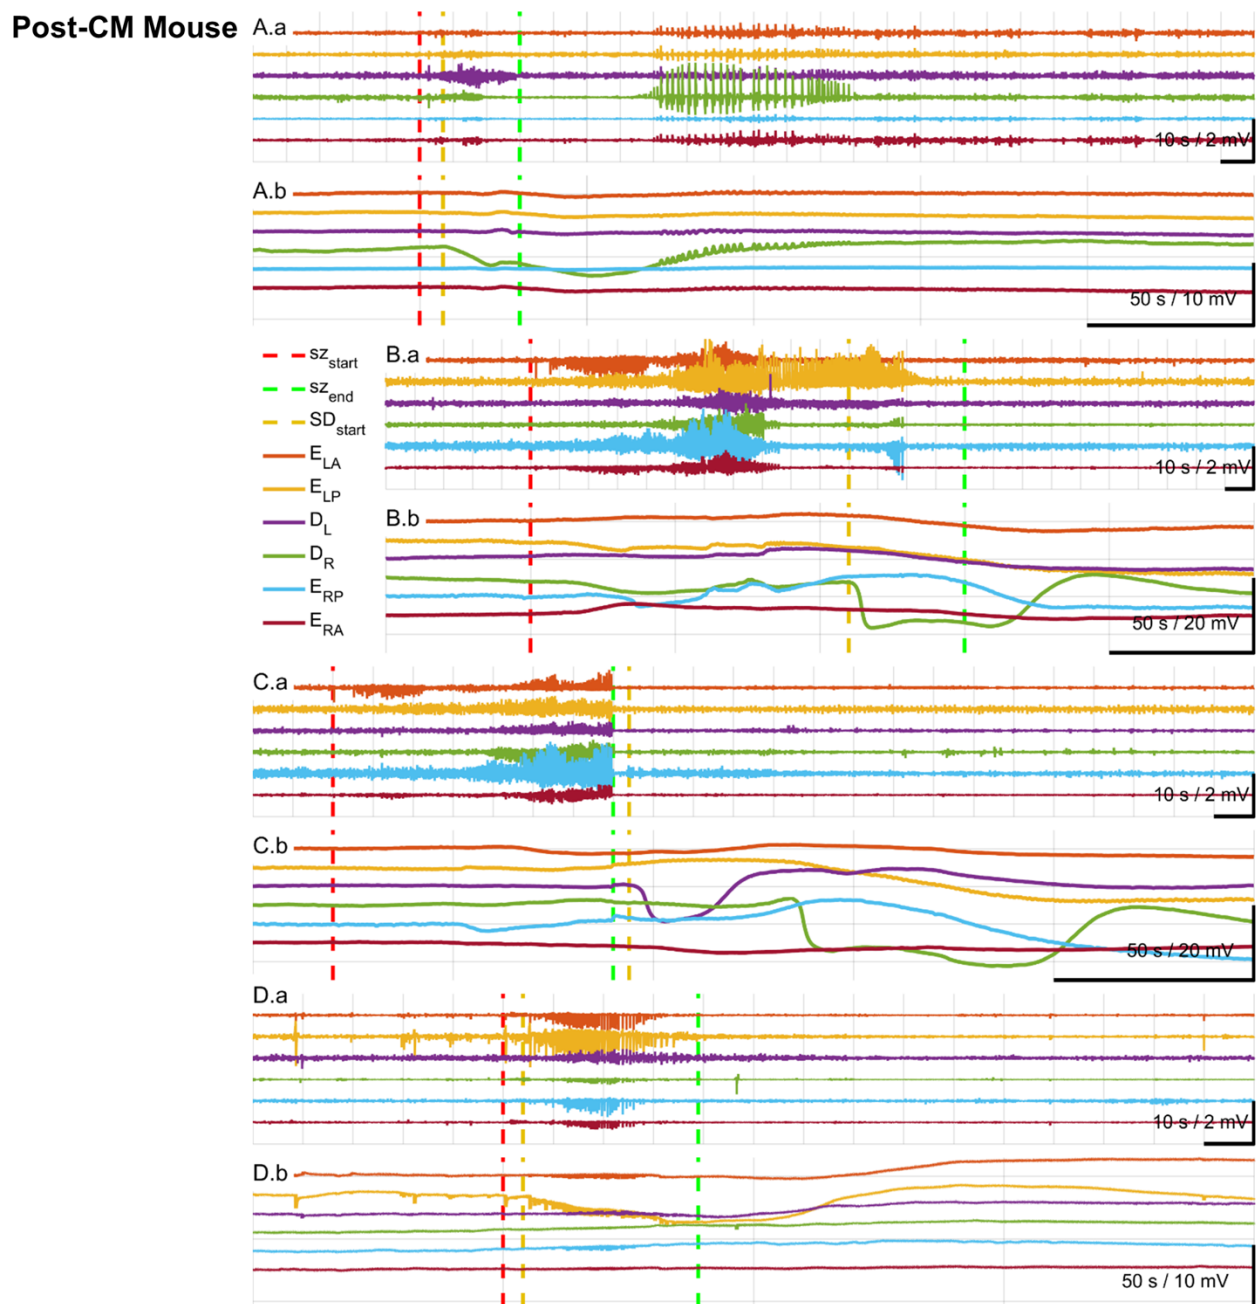

1 **Supplementary Figure 5: Types of spreading depression in the post-CM epileptic mice.** Negative DC  
2 deflections were observed mostly in hippocampal depth electrodes. Incidents of spreading depolarization  
3 were measured unilaterally (**B.b**) and bilaterally (**C.b**) in hippocampus often following or during a  
4 secondarily generalized seizure. At times the spreading depression occurred during a seizure and was  
5 concurrent with EEG suppression which was followed by a short run of high-amplitude spikes (**A.b**). Red  
6 and green dashed lines mark the onset and offset of the seizure. (**D.b**) An example of cortical SD (in E<sub>LP</sub>)

1 starting during a secondarily generalized seizure with cortical origin ( $E_{LP}$ ). The onset of the first measured  
2 SD in each panel is marked by a gold dashed line.

3 (Top traces) Bandpass filtered field potentials. A small focal hippocampal seizure is marked by the green  
4 box. (Bottom traces) Low-pass filtered hippocampal and cortical measurements. Filter settings for traces  
5 shown: Seizure traces band-pass 1-50 Hz; SD traces low-pass filter below 2 Hz.  $D_L$ , depth hippocampus  
6 left and  $D_R$ , depth hippocampus right,  $E_{LA}$ , ECoG left anterior,  $E_{RA}$ , ECoG right anterior and  $E_{LP}$ , ECoG  
7 left posterior,  $E_{RP}$ , ECoG right posterior.

8 Seizures in (A.a, B.a, C.a, D.a) correspond to SD events in (A.b, B.b, C.b, D.b) respectively.

9

10

1

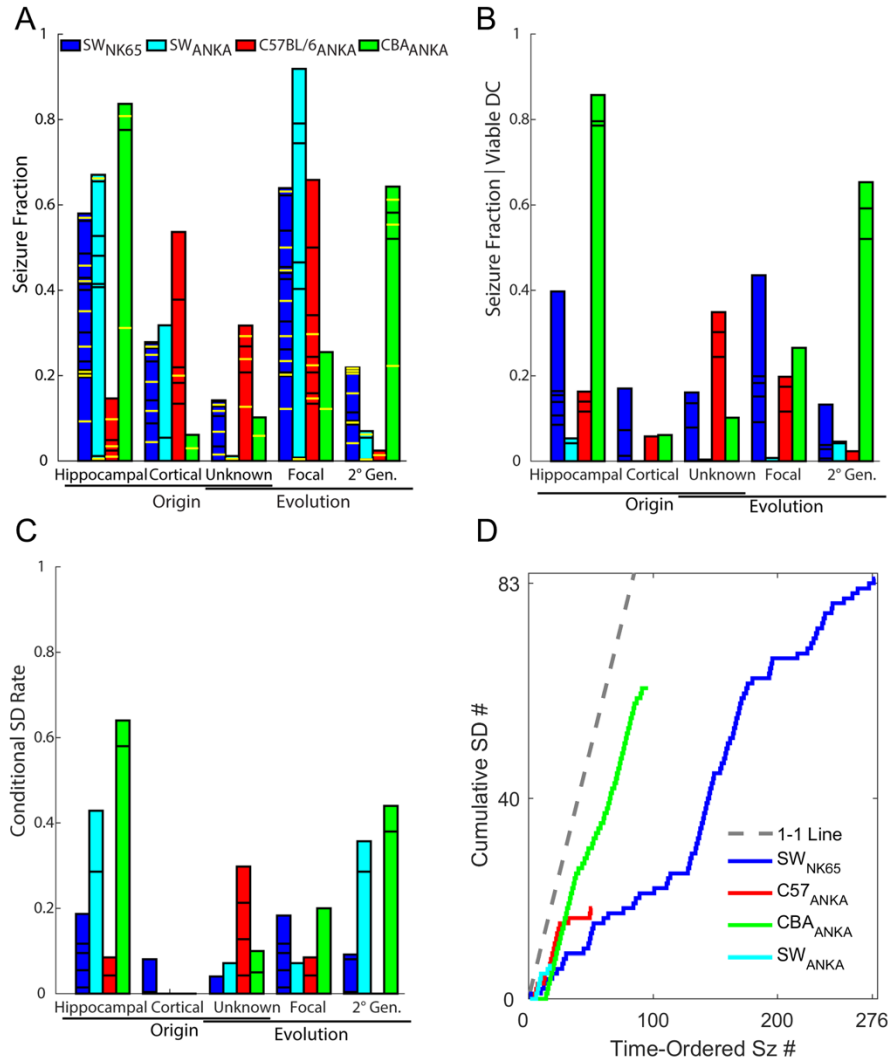

2 **Supplementary Figure 6: Origin and pattern of evolution in fraction of seizures followed by**

3 **spreading depolarization in post-CM mice.** Out of all epileptic animals, we included the ones with

4 chronic, stable DC measurements. **(A)** Distribution of fraction of seizures in all cohorts of the model; yellow

5 lines represent seizures from animals with viable DC recordings selected for further analysis. **(B)**

6 Distribution of fraction of seizures in epileptic animals with viable DC recordings. **(C)** Fraction of seizures

7 followed by spreading depolarization events out of the total seizures pooled from animals with stable DC

8 recordings. The SD rate here is conditioned on the mouse/parasite combinations, seizure origin, and seizure

9 evolution. Note that a small number of cortical origin seizures are accompanied by SD events. **(D)**

10 Cumulative count of seizure-associated SDs as a function of seizures rank-ordered by time of occurrence

11 for each epileptic cohort.

## 1   References for the Extended Data

- 2   Mader EC, Fisch BJ, Carey ME, Villemarette-Pittman NR (2005) Ictal onset slow potential shifts  
3       recorded with hippocampal depth electrodes. *Neurol Clin Neurophysiol.*
- 4   Mayanagi Y, Walker AE (1975) DC potentials of temporal lobe seizures in the monkey. *J Neurol*  
5       209:199–215 Available at: <http://link.springer.com/10.1007/BF00312542>.
- 6   Pinto DJ, Ermentrout GB (2001) Spatially Structured Activity in Synaptically Coupled Neuronal  
7       Networks: I. Traveling Fronts and Pulses. *SIAM J Appl Math.*
- 8   Whalen AJ, Xiao Y, Kadji H, Dahlem MA, Gluckman BJ, Schiff SJ (2018) Control of Spreading  
9       Depression with Electrical Fields. *Sci Rep.*

10

11

12
